# Supplementary material for: Sustainable natural rubber composites: masterbatch development of epoxidized natural rubber grafted to designed enzymatic polysaccharides
Source: Royal Society of Chemistry journal article supplement (doi:10.1039/d3qm00080j), 2023-01-01
Supplement: d3qm00080j1.pdf [file d3qm00080j1.pdf]

## Epoxidized natural rubber grafting onto - engineered polysaccharide and masterbatching for the fabrication of natural rubber composites

Azin Adibi<sup>1</sup>, Leonardo Simon<sup>1</sup>, Christian Lenges<sup>2</sup>, Tizazu H. Mekonnen<sup>1\*</sup>

<sup>1</sup>University of Waterloo, Department of Chemical Engineering, Waterloo, Ontario, Canada

<sup>2</sup>International Flavors & Fragrances Inc. (IFF), 200 Powder Mill Road E353, Wilmington, DE,

USA

\*Corresponding author(s) – E-mail: [tmekonnen@uwaterloo.ca](mailto:tmekonnen@uwaterloo.ca)

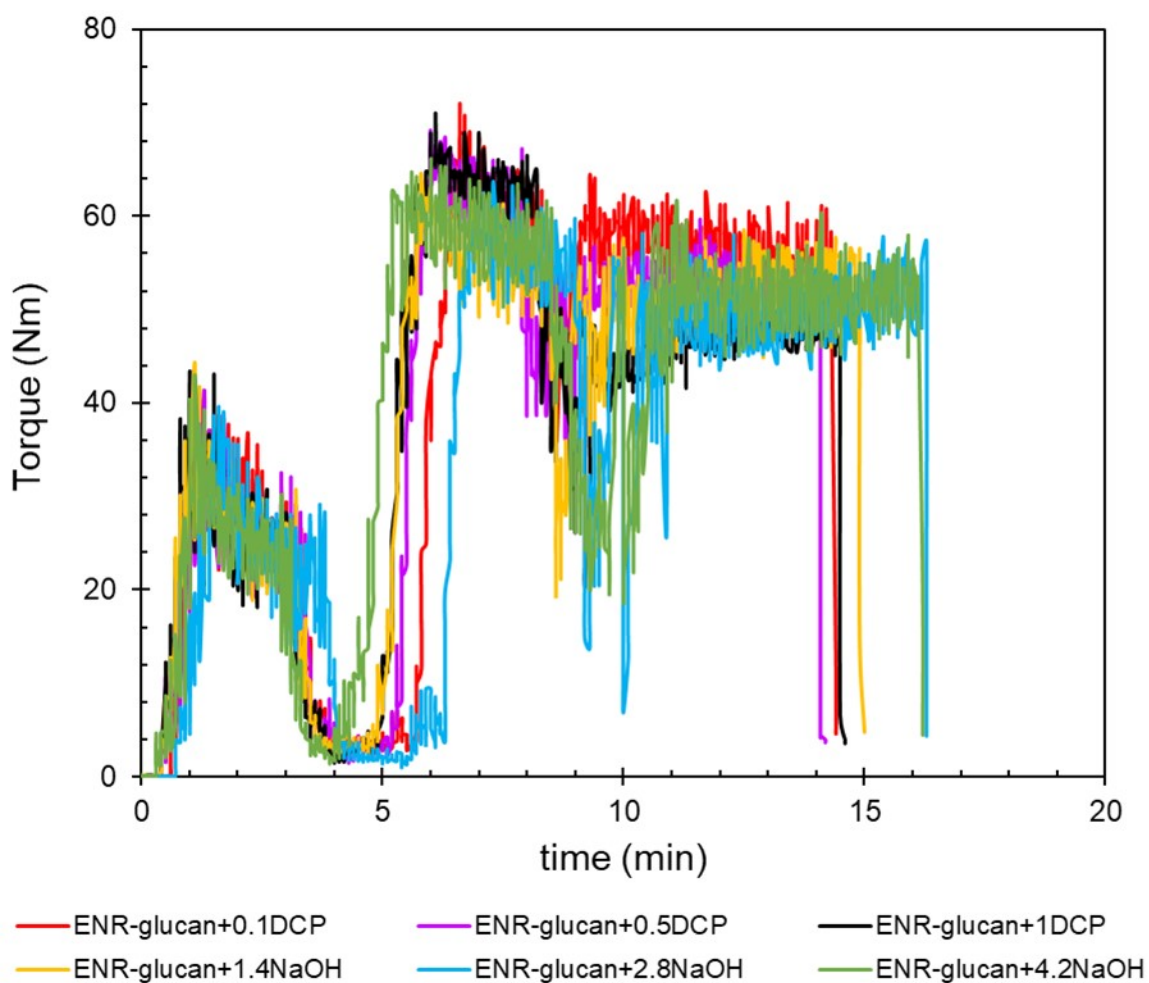

**Figure S1.** The torque graph of ENR-glucan blends with DCP/NaOH as catalyst.

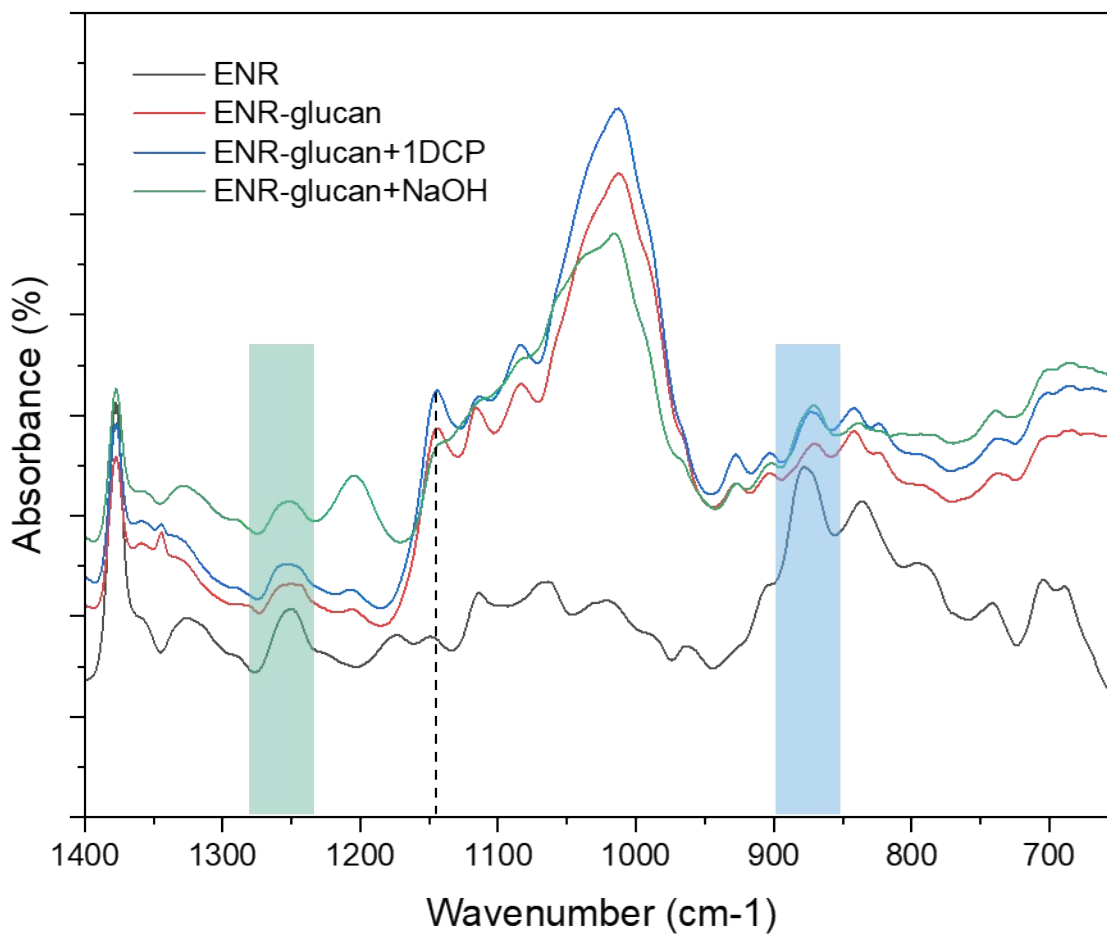

**Figure S2.** FTIR spectra of neat ENR and ENR-glucan composites in the wavenumber range of 600 to 1400  $\text{cm}^{-1}$

- Utilizing DCP as a catalyst leads to higher torque than NaOH in the batch mixing process, indicating more efficient ring opening of ENR and, subsequently, the formation of covalent bonds among ENR and glucan.

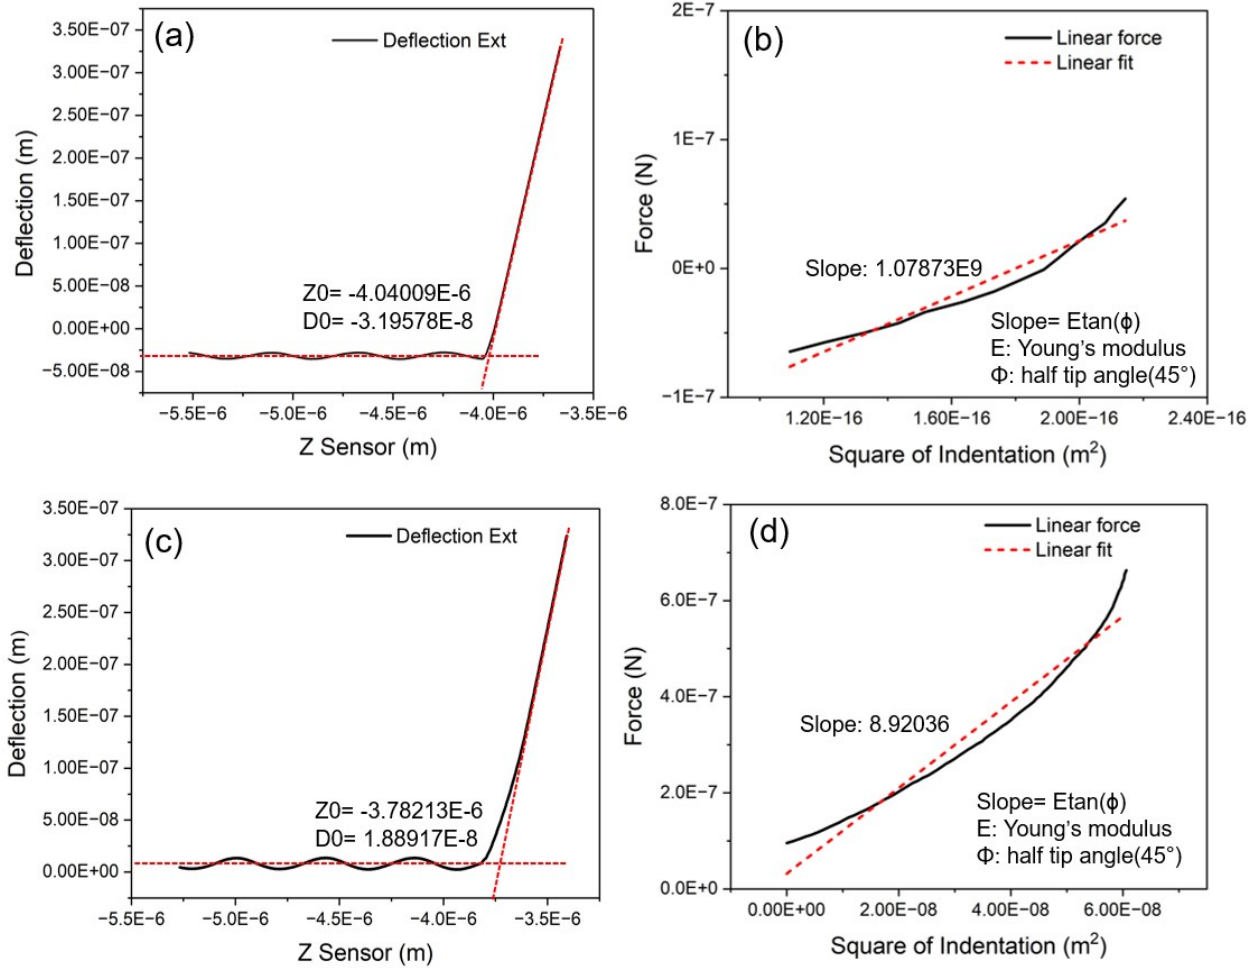

**Figure S3.** Force curves obtained from nanoindentation analysis of (a),(b) cellulose nanocrystal, and (c),(d) alpha-1,3 glucan.

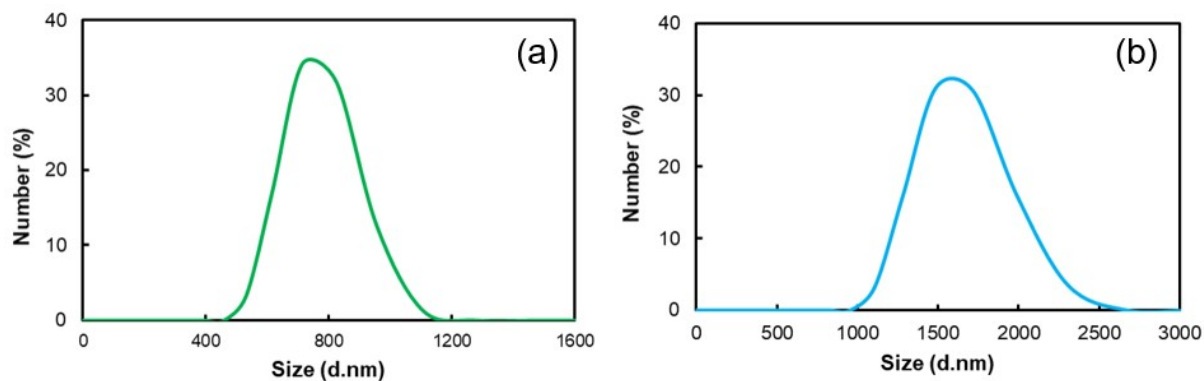

**Figure S4.** Particle size distribution of (a)silica and (b) calcium carbonate.

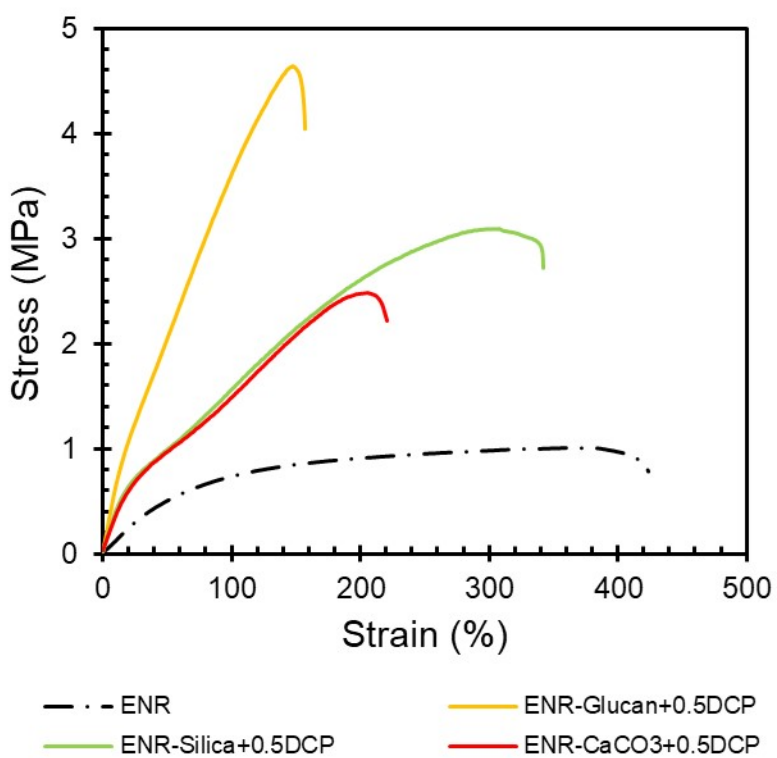

**Figure S5.** Stress strain curve of pure ENR and ENR composite with glucan, silica, and CaCO<sub>3</sub>.
